1 **cAMP stimulates SLC26A3 activity in human colon by a CFTR-dependent**  
2 **mechanism that does not require CFTR activity**

3

4 Chung-Ming Tse,<sup>1\*</sup> Jianyi Yin,<sup>1\*</sup> Varsha Singh,<sup>1</sup> Rafiquel Sarker,<sup>1</sup> Ruxian Lin,<sup>1</sup> Alan S.  
5 Verkman,<sup>2</sup> Jerrold R. Turner,<sup>3</sup> Mark Donowitz<sup>1,4</sup>

6

7 <sup>1</sup> Department of Medicine, Division of Gastroenterology and Hepatology, Johns Hopkins  
8 University School of Medicine, Baltimore, MD 21205

9 <sup>2</sup> Departments of Medicine and Physiology, University of California San Francisco, San  
10 Francisco, CA 94143

11 <sup>3</sup> Departments of Pathology and Medicine, Brigham and Women's Hospital, Harvard  
12 Medical School, Boston, MA 02115

13 <sup>4</sup> Department of Physiology, Johns Hopkins University School of Medicine, Baltimore,  
14 MD 21205

15 \* Co-first authors

16

17 **Correspondence**

18 Mark Donowitz, M.D.

19 Johns Hopkins University School of Medicine

20 720 Rutland Avenue, 925 Ross Research Building, Baltimore, MD 21205

21 Phone: 410-955-9675; Fax: 410-955-9677

22 E-mail: [mdonowit@jhmi.edu](mailto:mdonowit@jhmi.edu)

23

24 **Grant Support**

25 This study was supported in part by National Institutes of Health (NIH) grants R01-DK-  
26 26523, R01-DK-61765, P01-DK-072084, R24-DK-64388N, U1-TR000552, UH3-  
27 TR00003, UO1-DK-10316 and P30-DK-89502.

28

29 **Disclosures**

30 The authors disclose no conflicts of interest.

31

32 **Abstract**

33 **Background & Aims:** DRA (SLC26A3) is an electroneutral  $\text{Cl}^-/\text{HCO}_3^-$  exchanger that is  
34 present in the apical domain of multiple intestinal segments. An area that has continued  
35 to be poorly understood is related to DRA regulation in acute cAMP-related diarrheas, in  
36 which DRA appears to be both inhibited as part of NaCl absorption and stimulated to  
37 contribute to increased  $\text{HCO}_3^-$  secretion. Different cell models expressing DRA have  
38 shown that cAMP inhibits, stimulates or does not affect its activity.

39 **Methods:** This study reevaluated cAMP regulation of DRA using new “tools” including a  
40 successful knockout cell model, a specific DRA inhibitor ( $\text{DRA}_{\text{inh}}\text{-A250}$ ), specific  
41 antibodies, and a transport assay that did not rely on non-specific inhibitors. The  
42 studies compared DRA regulation in colonoids made from normal human colon with  
43 regulation in the colon cancer cell line, Caco-2.

44 **Results:** DRA is an apical protein in human proximal colon, differentiated colonoid  
45 monolayers and Caco-2 cells. It is glycosylated and appears as two bands. cAMP  
46 (forskolin) acutely stimulated DRA activity in human colonoids and Caco-2 cells. In  
47 these cells, DRA is the predominant apical  $\text{Cl}^-/\text{HCO}_3^-$  exchanger and is inhibited by  
48  $\text{DRA}_{\text{inh}}\text{-A250}$  with  $\text{IC}_{50}$  of 0.5  $\mu\text{mol/L}$  and 0.2  $\mu\text{mol/L}$ , respectively. However, there was  
49 no effect of cAMP in HEK293/DRA cells that lacked CFTR. When CFTR was  
50 expressed in HEK293/DRA cells, cAMP also stimulated DRA activity. In all cases,  
51 cAMP stimulation of DRA was not inhibited by  $\text{CFTR}_{\text{inh}}\text{-172}$ .

52 **Conclusions:** DRA is acutely stimulated by cAMP by a process that is CFTR-  
53 dependent but appears to be one of multiple regulatory effects of CFTR that does not  
54 require CFTR activity.

55

56 **Key Words:**  $\text{Cl}^-/\text{HCO}_3^-$  exchange; CFTR; colon; secretory diarrhea; enteroids

57

58

59

60

61

62

## 63 Introduction

64 There is a long-standing unexplained aspect of the regulation of intestinal electrolyte  
65 transport with relevance to the pathophysiology of diarrhea. This relates to acute  
66 regulation of SLC26A3 (DRA) activity. It is established that DRA is a  $\text{Cl}^-/\text{HCO}_3^-$   
67 exchanger with 1:1 stoichiometry that takes part in both intestinal  $\text{Cl}^-$  absorption and  
68  $\text{HCO}_3^-$  secretion. DRA is differentially expressed along the human intestinal horizontal  
69 axis, with maximum expression in the colon>ileum>duodenum>>jejunum. This is  
70 consistent with the role for DRA in ileal and proximal colonic neutral NaCl absorption in  
71 which it is linked to NHE3 and carries out  $\text{Cl}^-$  absorption. DRA is also part of the anion  
72 secretory process, accounting for a component of cAMP-stimulated intestinal  $\text{HCO}_3^-$   
73 secretion.<sup>1-4</sup>

74 In cAMP/cholera toxin-related diarrheas, there is both inhibition of neutral NaCl  
75 absorption and stimulation of  $\text{Cl}^-$  and  $\text{HCO}_3^-$  secretion.<sup>5-8</sup> It has never been explained  
76 how DRA can be both inhibited and stimulated at the same time in cAMP-related  
77 diarrhea. Attempts to study cAMP effects on DRA activity in cell-based systems have  
78 not been able to answer this question and reported cAMP regulation of DRA is  
79 contradictory based on the cell type studied. In HEK293/DRA cells and oocytes, there  
80 was no cAMP effect unless CFTR was also expressed, which led to modest  
81 stimulation.<sup>9,10</sup> In Caco-2 cells, cAMP inhibited DRA activity using  $^{36}\text{Cl}$  to measure  
82 unidirectional fluxes, which was accompanied by less brush border DRA.<sup>11</sup> In murine  
83 duodenal brush border vesicle studies, cAMP increased  $\text{Cl}^-/\text{HCO}_3^-$  exchange.<sup>12</sup> Most  
84 insights concerning basal and cAMP regulation of DRA have come from *in vivo* mouse  
85 studies. Under basal conditions, when NHE3 is present and active, DRA carries out net  
86  $\text{Cl}^-$  absorption and some  $\text{HCO}_3^-$  secretion, while if NHE3 is absent or inhibited, DRA  
87 carries out increased  $\text{HCO}_3^-$  secretion but only if CFTR is present.<sup>2,13,14</sup> DRA-mediated  
88  $\text{HCO}_3^-$  secretion was stimulated by cAMP in mouse duodenum and colon,<sup>3,4</sup> and the  
89 residual  $\text{HCO}_3^-$  secretion in DRA-KO mice was not sensitive to cAMP.<sup>4</sup> A major gap  
90 relevant to understanding human diarrheal disease pathophysiology is that these  
91 questions have not been asked in normal human intestine, specifically in the intestinal  
92 segments in which most linked NaCl absorption occurs, ileum and proximal colon.<sup>15,16</sup>  
93 Understanding how DRA is regulated by cAMP is especially important since intestinal

94  $\text{HCO}_3^-$  is lost in severe diarrheas, and in spite of inclusion of  $\text{HCO}_3^-$ /citrate in World  
95 Health Organization oral rehydration salts solution, the acidosis of severe diarrheas is  
96 often inadequately corrected.

97 Because of the recent availability of multiple new and underutilized cells system and  
98 specific “tools” for understanding DRA regulation, we have reexamined the acute effect  
99 of cAMP on DRA activity using normal human colonoids, in comparison with the widely  
100 used polarized human colon cancer cell line, Caco-2 cells. Colonoids are an *ex vivo*,  
101 self-perpetuating, primary cultured normal human colonic stem cell-derived model that  
102 can be grown as monolayers and studied in either an undifferentiated or crypt-like state  
103 or a differentiated or surface-like state.<sup>17</sup> Colonoid monolayers from normal human  
104 proximal colon were studied as this is a segment in which significant amounts of neutral  
105 NaCl absorption occurs along with anion secretion.

106

## 107 **Materials and Methods**

108 Chemicals and reagents were purchased from Thermo Fisher (Waltham, MA) or  
109 Sigma-Aldrich (St. Louis, MO) unless otherwise specified. All authors have had access  
110 to the study data and reviewed and approved the final manuscript.

111

## 112 **Cell culture**

113 HEK293 cells were cultured in Dulbecco's Modified Eagle Medium: Nutrient  
114 Mixture F-12 (DMEM/F-12) supplemented with 10% fetal bovine serum (FBS),  
115 100 U/mL penicillin, 100  $\mu\text{g}/\text{mL}$  streptomycin in a 5%  $\text{CO}_2$ /95% air atmosphere at 37 °C.  
116 The plasmid pCMV-SPORT6-SLC26A3 (human) was purchased from the DNA  
117 Resource Core at Harvard Medical School. p3xFLAG-DRA was constructed by  
118 inserting human SLC26A3 into p3xFLAG-CMV-10 between Xba1 and BamHI. A stable  
119 cell line that expresses p3xFLAG-DRA was established using Lipofectamine 2000  
120 according to the manufacturer's protocol and selected by G418 exposure. In some  
121 experiments, cells were transfected with N-terminal GFP-CFTR (provided by Dr.  
122 Liudmila Cebotaru, Johns Hopkins University) and studied at 48-72 hours after  
123 transfection.

124 Caco-2 cells were cultured in DMEM supplemented with 25 mmol/L NaHCO<sub>3</sub>, 0.1  
125 mmol/L nonessential amino acids, 10% FBS, 4 mmol/L glutamine, 100 U/mL penicillin,  
126 100 µg/mL streptomycin in a 5% CO<sub>2</sub>/95% air atmosphere at 37 °C. To generate a  
127 DRA-knockout (DRA-KO) Caco-2 cell line, cells were transduced with a lentivirus  
128 expressing doxycycline-inducible hCas9 followed by a lentivirus expressing a specific  
129 sgRNA that targets human DRA (GGACTGGGTAACATAGTCTG, NCBI reference  
130 sequence: NM\_000111.2). After induction by doxycycline and selection by  
131 puromycin/blastidicin exposure, positive clones were identified by immunoblotting.  
132 Genomic DNA was extracted, the target regions were amplified by PCR and sequenced  
133 by Sanger sequencing (Macrogen, Rockville, MD). For experiments, cells were plated  
134 on Transwell inserts (Corning Inc, Corning, NY) and studied at 14-18 days after  
135 reaching confluency.

136 Endoscopic specimens of human proximal colon were used to establish primary  
137 cultures of human colonoids as previously described.<sup>17,18</sup> Colonoids were expanded  
138 and plated on Transwell inserts (Corning Inc, Corning, NY) to form monolayers, as  
139 previously described.<sup>17,19</sup> For differentiation, colonoids were maintained in a medium  
140 that lacked Wnt3A, R-spondin1, and SB202190 for 5 days.<sup>19</sup> Most results of the  
141 current study were obtained from colonoids derived from one healthy donor, with similar  
142 results observed in colonoids from two other donors. The procurement and study of  
143 human colonoids was approved by the Institutional Review Board of Johns Hopkins  
144 University School of Medicine (NA\_00038329).

145

## 146 **Immunofluorescence**

147 Cells were fixed in 4% paraformaldehyde for 20 minutes, incubated with 5% bovine  
148 serum albumin/0.1% saponin in PBS for 1 hour, and incubated with primary antibody  
149 against DRA (mouse monoclonal, 1:100, sc-376187, Santa Cruz, Dallas, TX) overnight  
150 at 4 °C. Cells were then incubated with Hoechst 33342 and secondary antibody against  
151 mouse IgG (1:100) for 1 hour at room temperature. Finally, cells were mounted and  
152 studied using a Carl Zeiss LSM510/META confocal microscope (Thornwood, NY). In  
153 addition, the atlas of intestinal transport (<https://www.jrturnerlab.com/Transporter->

154 Images) was accessed to determine the localization of DRA and CFTR in healthy  
155 human proximal colon.

156

### 157 **Immunoblotting**

158 Cells were rinsed three times with PBS and harvested in PBS by scraping. Cell  
159 pellets were collected by centrifugation, solubilized in lysis buffer (60 mmol/L HEPES,  
160 150 mmol/L NaCl, 3 mmol/L KCl, 5 mmol/L EDTA trisodium, 3 mmol/L EGTA, 1 mmol/L  
161 Na<sub>3</sub>PO<sub>4</sub>, 1% Triton X-100, pH 7.4) containing a protease inhibitor cocktail, and  
162 homogenized by sonication. Protein concentration was measured using the  
163 bicinchoninic acid method. Proteins were incubated with SDS buffer (5 mmol/L Tris-  
164 HCl, 1% SDS, 10% glycerol, 1% 2-mercaptoethanol, pH 6.8) at 37 °C for 10 minutes,  
165 separated by SDS-PAGE on a 10% acrylamide gel, and transferred onto a nitrocellulose  
166 membrane. The blot was blocked with 5% non-fat milk, probed with primary antibodies  
167 against DRA (mouse monoclonal, 1:500, sc-376187, Santa Cruz), GAPDH (mouse  
168 monoclonal, 1:5000, G8795, Sigma-Aldrich),  $\beta$ -actin (mouse monoclonal, 1:5000,  
169 A2228, Sigma-Aldrich) overnight at 4 °C, followed by secondary antibody against  
170 mouse IgG (1:10000) for 1 hour at room temperature. Protein bands were visualized  
171 and quantitated using an Odyssey system and Image Studio software (LI-COR  
172 Biosciences, Lincoln, NE).

173

### 174 **Surface biotinylation**

175 At 4 °C, cells were incubated with 1.5 mg/mL NHS-SS-biotin and solubilized by lysis  
176 buffer. A small proportion of the protein lysate was collected as the total lysate, while  
177 the rest was incubated with avidin-agarose beads overnight. The beads were  
178 centrifuged and washed with lysis buffer containing 0.1% Triton X-100. Biotinylated  
179 proteins were eluted from the beads and collected as the surface fraction.  
180 Immunoblotting was performed as described above and the percentage of surface  
181 expression of DRA was calculated as previously reported.<sup>20</sup>

182

183

184

## 185 **Measurement of Cl<sup>-</sup>/HCO<sub>3</sub><sup>-</sup> exchange activity**

186 Cl<sup>-</sup>/HCO<sub>3</sub><sup>-</sup> exchange activity was measured fluorometrically using the intracellular pH  
187 (pH<sub>i</sub>)-sensitive dye BCECF-AM and a custom chamber allowing separate apical and  
188 basolateral superfusion, as previously described.<sup>21</sup> Cells were incubated with 10 μmol/L  
189 BCECF-AM in Na<sup>+</sup> solution (138 mmol/L NaCl, 5 mmol/L KCl, 2 mmol/L CaCl<sub>2</sub>,  
190 1 mmol/L MgSO<sub>4</sub>, 1 mmol/L NaH<sub>2</sub>PO<sub>4</sub>, 10 mmol/L glucose, 20 mmol/L HEPES, pH 7.4)  
191 for 30-60 minutes at 37 °C and mounted in a fluorometer (Photon Technology  
192 International, Birmingham, NJ). Cells were superfused with Cl<sup>-</sup> solution (110 mmol/L  
193 NaCl, 5 mmol/L KCl, 1 mmol/L CaCl<sub>2</sub>, 1 mmol/L MgSO<sub>4</sub>, 10 mmol/L glucose, 25 mmol/L  
194 NaHCO<sub>3</sub>, 1 mmol/L amiloride, 5 mmol/L HEPES, 95% O<sub>2</sub>/5% CO<sub>2</sub>) or Cl<sup>-</sup>-free solution  
195 (110 mmol/L Na-gluconate, 5 mmol/L K-gluconate, 5 mmol/L Ca-gluconate, 1 mmol/L  
196 Mg-gluconate, 10 mmol/L glucose, 25 mmol/L NaHCO<sub>3</sub>, 1 mmol/L amiloride, 5 mmol/L  
197 HEPES, 95% O<sub>2</sub>/5% CO<sub>2</sub>) under a flow rate of 1 mL/min. The switch between Cl<sup>-</sup>  
198 solution and Cl<sup>-</sup>-free solution causes HCO<sub>3</sub><sup>-</sup> movement across the cell membrane  
199 carried out by Cl<sup>-</sup>/HCO<sub>3</sub><sup>-</sup> exchanger(s), and the resulting change in pH<sub>i</sub> was recorded.  
200 For Caco-2 and colonoid monolayers, the apical side was superfused with Cl<sup>-</sup> solution  
201 or Cl<sup>-</sup>-free solution, while the basolateral side was superfused continuously with Cl<sup>-</sup>  
202 solution. Multiple rounds of removing/replenishing extracellular Cl<sup>-</sup> were performed to  
203 determine the Cl<sup>-</sup>/HCO<sub>3</sub><sup>-</sup> exchange activity under basal conditions as a time control as  
204 well as in the presence of several compounds, including forskolin (10 μmol/L, apical and  
205 basolateral) and CFTR<sub>inh</sub>-172 (5 μmol/L, apical). The cells were exposed to these  
206 compounds for at least 8 minutes before their effects on Cl<sup>-</sup>/HCO<sub>3</sub><sup>-</sup> exchange activity  
207 was determined. In some experiments, SO<sub>4</sub><sup>2-</sup> solution (55 mmol/L Na<sub>2</sub>SO<sub>4</sub>, 55 mmol/L  
208 mannitol, 5 mmol/L K-gluconate, 1 mmol/L Ca-gluconate, 1 mmol/L Mg-gluconate,  
209 10 mmol/L glucose, 25 mmol/L NaHCO<sub>3</sub>, 2 mmol/L Tenapanor [provided by Ardelyx,  
210 Inc., Fremont, CA], 10 mmol/L HOE-694 [provided by Jorgen Peunter, Sanofi], 5 mmol/L  
211 HEPES, 95% O<sub>2</sub>/5% CO<sub>2</sub>) was used to determine if there was any SO<sub>4</sub><sup>2-</sup>/HCO<sub>3</sub><sup>-</sup>  
212 exchange. At the end of each experiment, pH<sub>i</sub> was calibrated using K<sup>+</sup> clamp solutions  
213 with 10 μmol/L nigericin (Cayman Chemical, Ann Arbor, MI) that were set at pH 6.8 and  
214 7.6. The rate of initial alkalinization following the switch from Cl<sup>-</sup> solution to Cl<sup>-</sup>-free  
215 solution was calculated using Origin 8.0 software (OriginLab, Northampton, MA).

## 216 **Determination of IC<sub>50</sub> of DRA inhibitor**

217 A novel small-molecule DRA inhibitor (DRA<sub>inh</sub>-A250) was recently developed.<sup>22</sup>  
218 Following exposure to the inhibitor in both apical and basolateral superfusate for at least  
219 15 minutes, the effects of serial concentrations of the inhibitor (0, 0.1, 0.25, 0.5, 1, 2.5, 5  
220 μmol/L) on Cl<sup>-</sup>/HCO<sub>3</sub><sup>-</sup> exchange activity was studied. The IC<sub>50</sub> was calculated by a  
221 logistic regression model using Origin 8.0 software.

## 223 **Statistical analysis**

224 The results of at least three repeated experiments of HEK293 cells, Caco-2 cells,  
225 and colonoids were used for statistical analysis. Data are presented as mean ± SEM  
226 (standard error of the mean). Statistical analyses were conducted using the Student's t  
227 test or ANOVA if more than two comparisons were performed. *P* < 0.05 was considered  
228 statistically significant.

## 230 **Results**

### 231 **DRA is expressed in Caco-2 cells, proximal colonoids, and human proximal colon** 232 **with increased expression with differentiation**

233 DRA was identified with a commercially available antibody in polarized Caco-2 cells  
234 grown on Transwell inserts, as a protein with two bands, one >102 kDa and one >76  
235 kDa (**Fig 1A**), as previously reported.<sup>19</sup> The specificity of this antibody was supported  
236 by CRISPR/Cas9 KO in Caco-2 cells (**Fig 1A**). In addition, while HEK293 cells do not  
237 express DRA endogenously, transfection of human DRA revealed the same two  
238 bands.<sup>19</sup> In addition, we previously reported that deglycosylation of DRA by PNGase F  
239 in HEK293/DRA cells and differentiated duodenal enteroids caused both DRA bands to  
240 decrease to a common molecular weight just below 76 kDa.<sup>19</sup> Furthermore, DRA  
241 expression increases with differentiation, as illustrated in Caco-2 cells grown on semi-  
242 permeable supports. This is shown in **Fig 1B** with lack of significant DRA expression 4  
243 days post-confluency with increasing expression until day 14-18.

244 In human proximal colonoids, DRA expression also greatly increased in  
245 differentiated cells (5 days after WNT3A removal) compared to undifferentiated cells  
246 (grown in the presence of WNT3A) (**Fig 1C**). This occurred at least in part



247 transcriptionally, as we previously reported, with increase in DRA mRNA of 21 fold upon  
248 differentiation of duodenal enteroids determined by qRT-PCR.<sup>19</sup> In addition,  
249 differentiated proximal colonic enteroids had apical and subapical DRA expression  
250 which was much greater than expression in undifferentiated proximal colonoids (not  
251 shown) (**Fig 1D**).

252 The increased DRA expression in differentiated proximal colonoids modeled  
253 expression in normal human colon. Immunofluorescence of normal human proximal  
254 colon demonstrated increased DRA expression in colonic surface and upper crypt  
255 compared to lower crypt (**Fig 1E**).

256

### 257 **Cl<sup>-</sup>/HCO<sub>3</sub><sup>-</sup> exchange activity in proximal colonoids and Caco-2 cells is** 258 **predominantly via SLC26A3 (DRA) and not SLC26A6 (PAT1)**

259 DRA activity was quantified as extracellular Cl<sup>-</sup> removal-driven alkalinization in the  
260 presence of 25 mmol/L HCO<sub>3</sub><sup>-</sup> /5% CO<sub>2</sub> (Cl<sup>-</sup>/HCO<sub>3</sub><sup>-</sup> exchange) and inhibitors of other  
261 acid-base altering transporters, particularly the NHEs. DRA-transfected HEK293 cells  
262 showed an immediate initiation of alkalinization with removal of extracellular Cl<sup>-</sup> (**Figs**  
263 **2A, 2D, 3A**), while untransfected cells had minimal alkalinization (**Fig 2D**).

264 Similar rapidly initiated alkalinization following apical Cl<sup>-</sup> removal occurred when this  
265 assay was applied to Caco-2 cells (21 days post-confluency) (**Figs 2B, 3B**). This  
266 alkalinization was not present in Caco-2 cells in which DRA was knocked out by  
267 CRISPER/ Cas9 (**Fig 2E**).

268 DRA activity was also present and measurable by the apical Cl<sup>-</sup> removal assay in  
269 differentiated human colonoid monolayers (**Fig 2C, 3C**). In all three cell types, addition  
270 back of Cl<sup>-</sup> to reverse the Cl<sup>-</sup> gradient (apically for Caco-2 and colonoids) rapidly  
271 acidified the cells to a pH<sub>i</sub> close to the initial pH<sub>i</sub> (**Figs 2A-C**). In all three cells types,  
272 multiple cycles of removing and adding Cl<sup>-</sup> back were performed and at least two and  
273 usually three cycles of Cl<sup>-</sup> removal/readdition led to very similar initial rates of  
274 alkalinization/acidification (**Figs 2A-C**). This allowed using a single monolayer to  
275 determine basal and acutely regulated DRA activity by studying two sequential cycles of  
276 apical Cl<sup>-</sup> removal/readdition.

277 Specificity of the assay for DRA activity was established by two methods, with the  
278 major concern being whether the other SLC26A family member expressed throughout  
279 the human GI tract, SLC26A6 (PAT-1), was present and accounted for some or all of  
280 the Cl<sup>-</sup> removal-related alkalization. The anion sulfate is transported by PAT-1 but not  
281 DRA;<sup>23</sup> thus whether sulfate could acidify cells when sulfate replaced Cl<sup>-</sup> in “Cl<sup>-</sup> solution”  
282 was considered a contribution of PAT-1 and not DRA. As shown in **Figs 3A-C** in  
283 HEK293/DRA cells, Caco-2 cells and differentiated colonoids, applying a sulfate  
284 gradient did not acidify pH<sub>i</sub>, although in the same cells, then adding Cl<sup>-</sup> (apically for  
285 Caco-2 and colonoid monolayers) induced rapid intracellular acidification. This finding  
286 suggests that these cells exhibited minimal SO<sub>4</sub><sup>2-</sup>/HCO<sub>3</sub><sup>-</sup> exchange and supports that  
287 PAT-1 is not a significant contributor to the Cl<sup>-</sup>/HCO<sub>3</sub><sup>-</sup> exchange assays in these three  
288 cell types. In addition, we used a newly described small-molecule DRA inhibitor,  
289 DRA<sub>inh</sub>-A250, which lacks effects on other members of the SLC26A family as a second  
290 method to determine the specificity of the DRA assay. Inhibition of DRA by DRA<sub>inh</sub>-  
291 A250 was reversible with an IC<sub>50</sub> reported in FRT/DRA cells of ~0.2 μmol/L.<sup>22</sup> This  
292 inhibitor similarly inhibited DRA in HEK293/DRA cells, Caco-2 cells and human  
293 colonoids (**Figs 4A-C**). In HEK293/DRA cells, Caco-2 cells and colonoids, IC<sub>50</sub>s were  
294 determined of 0.12 ± 0.04 μmol/L, 0.53 ± 0.10 μmol/L and 0.22 ± 0.08 μmol/L,  
295 respectively (n=3 for each). These studies indicate that apical Cl<sup>-</sup>/HCO<sub>3</sub><sup>-</sup> exchange  
296 activity in HEK293/DRA, Caco-2 and proximal colonoids was almost entirely due to  
297 DRA activity.

298

### 299 **cAMP rapidly stimulates DRA by a CFTR-dependent process that does not require** 300 **CFTR activity**

301 To determine whether cAMP acutely affects DRA activity, studies were carried out in  
302 HEK293 and Caco-2 cells and in human colonoid monolayers. Initial studies were  
303 performed in HEK293 cells that stably express human DRA but do not express CFTR  
304 endogenously.<sup>9,24</sup> DRA activity was present but exposure to forskolin (10 μmol/L, 10  
305 min) did not alter DRA activity (**Figs 5A, B**).

306 Similar studies were performed in Caco-2 cells and human colonoids. Results were  
307 different; as shown in **Figs 5C and 5D**, forskolin (10 μmol/L, 10 min) caused acute

308 stimulation of DRA activity in both Caco-2 and colonoid monolayers. It was further  
309 determined whether cAMP-dependent stimulation of DRA was associated with  
310 stimulation of DRA trafficking. This was done by cell surface biotinylation. Forskolin (10  
311  $\mu\text{mol/L}$ , 30 min) significantly increased DRA cell surface expression in Caco-2 cells  
312 (**Figs 6A, B**); similarly, under the same experimental conditions as used for cell surface  
313 biotinylation, forskolin increased the amount of surface DRA visualized by  
314 immunofluorescence (**Fig 6C**).

315 Because the presence of CFTR in oocytes was sufficient for cAMP stimulation in  
316 DRA activity to occur,<sup>10</sup> it was determined whether forskolin stimulated DRA activity in  
317 HEK293/DRA cells that expressed CFTR. HEK293 cells do not endogenously express  
318 CFTR.<sup>24</sup> Lipofectamine transfection was used to transiently express GFP-CFTR and  
319 over 90% of cells expressed GFP-CFTR after transfection as confirmed by microscopic  
320 observation using a Keyence BZ-X700 fluorescence microscope (Itasca, IL). Forskolin  
321 stimulated DRA activity in HEK293/DRA cells transfected with CFTR (**Fig 7A**). CFTR  
322 transports  $\text{HCO}_3^-$ , with a lower permeability compared to  $\text{Cl}^-$ , but there is increasing  
323  $\text{HCO}_3^-$  permeability at least in some cell types with intracellular  $\text{Cl}^-$  depletion, as initially  
324 occurs with cAMP-stimulated  $\text{Cl}^-$  secretion.<sup>25</sup> Consequently, we considered whether the  
325 CFTR/FSK-dependent increase in intracellular alkalinization after  $\text{Cl}^-$  removal could be  
326 due to CFTR transporting  $\text{HCO}_3^-$ . This was examined by studying the forskolin effect on  
327 DRA activity in HEK293/DRA/CFTR cells when CFTR activity was inhibited using the  
328 specific inhibitor, CFTR<sub>inh</sub>-172. CFTR<sub>inh</sub>-172 did not alter the forskolin stimulation of  
329 DRA activity measured as  $\text{Cl}^-$  removal-stimulated alkalinization in HEK293/DRA/CFTR  
330 cells (**Figs 7A, B**). This demonstrates that cAMP stimulation of DRA requires CFTR but  
331 does not require CFTR transport activity.

332 Caco-2 cells are known to express CFTR. Similarly, immunofluorescence of  
333 differentiated human proximal colonoids demonstrated expression of CFTR as well as  
334 DRA in the apical domain (**Fig 1E, F**). Similar studies to those in HEK cells determined  
335 whether CFTR activity was necessary for forskolin stimulation of DRA in Caco-2 cells  
336 and human colonoids. Inhibiting CFTR with CFTR<sub>inh</sub>-172 did not affect forskolin  
337 stimulation of DRA activity in either Caco-2 cells (**Figs 8A-C**) or colonoids (**Figs 8D-F**).

338

## 339 Discussion

340 DRA is a glycoprotein, both when exogenously expressed in HEK293 cells and CHO  
341 cells or endogenously expressed in mouse intestine.<sup>26-29</sup> Its molecular size as revealed  
342 by Western blot varies and this is probably due to heterogenous glycosylation in  
343 different cell systems and animal species.<sup>26-30</sup> We report here that human DRA in  
344 HEK293/DRA cells, Caco-2 cells and differentiated proximal colonoids appears as two  
345 bands; the upper band is slightly above 102 kDa and the lower band is slightly above 76  
346 kDa, and as previously demonstrated, both of these bands are glycosylated.<sup>19</sup> While  
347 the distribution of DRA throughout the human GI tract both horizontally and vertically  
348 has been described and there is no debate that it functions as a  $\text{Cl}^-/\text{HCO}_3^-$  exchanger  
349 with 1:1 stoichiometry, there continues to be confusion relating to its acute regulation,  
350 particularly in digestive physiology and in the pathophysiology of cAMP-driven secretory  
351 diarrheal diseases. The current study was undertaken to reevaluate acute regulation of  
352 DRA based on the availability of a) new normal human colonoid models that are  
353 segment specific, allowing what occurs in human proximal colon to be examined. The  
354 proximal colon was selected for study as it is the site of high DRA expression and is  
355 known to be the site of a large amount of  $\text{Na}^+$  absorption, specifically neutral NaCl  
356 absorption, and also of anion secretion, both processes in which DRA has been  
357 implicated. Importantly the ability to study only epithelial cells in the stem cell-derived  
358 colonoids allows better control of regulators of transport. In addition, studying  
359 differentiated colonoids as monolayers, which represent the upper crypt and surface  
360 cells compared to undifferentiated colonoids representing the lower crypt, allowed  
361 concentration on the proximal colonic cells with the highest DRA expression with results  
362 not diluted by lower expressing cells; b) more specific tools than what have been  
363 available previously that include a DRA-specific small-molecule inhibitor (DRA<sub>inh</sub>-A250),  
364 and DRA-KO by CRISPR/Cas9 as well as antibody validated by KO and expression in  
365 null cells; c) an assay of DRA activity that does not rely on non-specific antagonists,  
366 such as DIDS or niflumic acid; d) an assay measuring  $\text{Cl}^-/\text{HCO}_3^-$  exchange instead of  
367 hydroxide/iodide exchange as hydroxide ion may not be an adequate substrate of  
368 DRA.<sup>31</sup>

369 Emphasis was on DRA regulation by elevated cAMP because of a) the importance of  
370 both inhibition of neutral NaCl absorption and stimulation of active anion secretion in  
371 secretory but non-inflammatory diarrheas. Both processes occur in the proximal colon  
372 and examples of DRA regulation in diarrhea models in this segment have been  
373 reported, including salmonella in which DRA message and protein are reduced and  
374 EPEC in which surface expression is reduced;<sup>32,33</sup> b) inconsistent previous reports of  
375 cAMP effects on DRA activity in multiple cell models as reviewed in the introduction and  
376 some segment-specific differences described for mouse intestine. In mouse duodenum,  
377 forskolin stimulates  $\text{HCO}_3^-$  secretion by a DRA-dependent process that also requires  
378 CFTR including CFTR activity.<sup>2,3</sup> In mid-distal mouse colon, in which a large amount of  
379 DRA is expressed, basal  $\text{HCO}_3^-$  secretion was DRA-dependent but CFTR-independent;  
380 however, with forskolin stimulation, the increased  $\text{HCO}_3^-$  secretion was dependent on  
381 CFTR.<sup>34</sup>

382 The finding presented here is that in both Caco-2 cells and human proximal colonic  
383 enteroids, forskolin stimulates DRA activity by a CFTR-dependent process, which is  
384 similar to what occurs in the mouse duodenum and mid-distal colon.<sup>3,4</sup> Forskolin/cAMP  
385 did not directly activate DRA as its stimulatory effect occurred in HEK293/DRA/CFTR  
386 but not HEK293/DRA cells. Similarly, cAMP did not increase  $\text{HCO}_3^-$  secretion in PAT-  
387 1/CFTR double-KO mouse duodenum.<sup>3</sup> In addition, CFTR<sub>inh-172</sub> had no effect on  
388 forskolin stimulation of DRA activity, suggesting that the increased rate of intracellular  
389 alkalinization in the presence of forskolin was not due to entry of  $\text{HCO}_3^-$  via CFTR in our  
390 assay. This represents another example of the regulatory function of CFTR that does  
391 not require the transport function of CFTR.<sup>35</sup> The current study concentrated only on  
392 human proximal colonoids that were differentiated and thus represented surface and  
393 upper crypt epithelial cells. Similarly, we showed by immunofluorescence that intact  
394 normal human proximal colon upper crypt and surface epithelial cells contained both  
395 CFTR and DRA. Moreover, the forskolin stimulation was associated with increased  
396 surface DRA supporting that trafficking or increased plasma membrane stability is  
397 involved in the mechanism of the cAMP stimulation of DRA. Thus, these studies  
398 identify that CFTR is involved in cAMP stimulation of DRA activity.

399 Intestine is not the only transporting tissue that expresses CFTR and  $\text{Cl}^-/\text{HCO}_3^-$   
400 exchangers of the SLC26A family. Studies in the widely studied human airway cell line  
401 Calu-3 examined mechanisms of cAMP-stimulated  $\text{HCO}_3^-$  secretion.<sup>36</sup> These cells  
402 express a large amount of CFTR and much less SLC26A4 (pendrin). Forskolin-  
403 stimulated  $\text{HCO}_3^-$  secretion in Calu-3 cells was entirely CFTR-dependent and not  
404 affected by SLC26A4 knockdown, identifying an additional model of cAMP-stimulated  
405  $\text{HCO}_3^-$  secretion in cells that contain both CFTR and members of the SLC26 family.

406 The mechanism by which CFTR is necessary for cAMP stimulation of DRA activity  
407 has not been determined in human intestinal epithelial cells, including proximal  
408 colonoids. However, Ko *et al* used non-polarized HEK293 cells expressing CFTR and  
409 DRA to suggest a mechanism that involved mutual activation of DRA and CFTR.<sup>37</sup>  
410 They demonstrated that CFTR and DRA were in the same complex (based on co-  
411 precipitation), and forskolin-stimulated  $\text{HCO}_3^-$  secretion required DRA activity and was  
412 not accounted for by CFTR transporting  $\text{HCO}_3^-$ .<sup>37</sup> cAMP caused DRA and CFTR to  
413 mutually activate each other by a mechanism that required the presence of both their C-  
414 terminal PDZ domain interaction sequences and involved the cAMP phosphorylated  
415 CFTR R domain and the DRA STAS domain. This activation of CFTR was not by  
416 altering the cAMP stimulation of its trafficking. While DRA activity was not explicitly  
417 shown to be required for CFTR activation, mutated DRA found in congenital  $\text{Cl}^-$  diarrhea  
418 did not allow the cAMP activation of CFTR. Not yet evaluated in human proximal  
419 colonoids, we hypothesize that the cAMP stimulation of DRA activity requiring CFTR but  
420 not CFTR transport activity in polarized human intestinal cells is likely to occur by a  
421 mechanism(s) similar to the interactions demonstrated by Ko *et al*.<sup>37</sup>

422 Our study shows in HEK293/DRA cells, forskolin stimulation of DRA is CFTR  
423 dependent but that dependence does not require CFTR transport activity. Similarly, in  
424 Caco-2 cells and human proximal colonoids, both of which express CFTR  
425 endogenously, blocking CFTR activity did not alter cAMP stimulation of DRA activity.  
426 Thus cAMP stimulation of DRA activity in human proximal colonoids and Caco-2 cells  
427 by a process that requires CFTR that is separate from the CFTR transport activity is  
428 different than the interactions identified in several other transporting epithelial cells, with  
429 multiple pathophysiologic mechanisms having evolved for cAMP-related  $\text{HCO}_3^-$

430 secretion in polarized epithelia. Those reported vary from  $\text{HCO}_3^-$  secretion entirely via  
431 CFTR (Calu-3 cells) to involving DRA and requiring CFTR protein and transport activity  
432 (mouse duodenum and mid-distal colon).  $\text{HCO}_3^-$  secretion functions to unfold mucus  
433 including that secreted by goblet cells which is protective against pathogens and inhaled  
434 physical agents. From an evolutionary perspective,  $\text{HCO}_3^-$  secretion has important  
435 protective functions in multiple tissues and thus it is not unexpected the multiple  
436 mechanisms to regulate its secretion, identified here as cAMP-related, have evolved.

437

### 438 **Acknowledgments**

439 We would like to thank Dr. Liudmila Cebotaru (Johns Hopkins University, Baltimore,  
440 MD) for providing the GFP-CFTR construct and Ardelyx, Inc. (Fremont, CA) for  
441 providing Tenapanor.

442

### 443 **References**

- 444 1. Ghishan FK, Kiela PR. Small intestinal ion transport. *Curr Opin Gastroenterol*  
445 2012;28(2):130-4.
- 446 2. Singh AK, Riederer B, Chen M, Xiao F, Krabbenhoft A, Engelhardt R, Nylander  
447 O, Soleimani M, Seidler U. The switch of intestinal Slc26 exchangers from anion  
448 absorptive to  $\text{HCO}_3^-$  secretory mode is dependent on CFTR anion channel  
449 function. *Am J Physiol Cell Physiol* 2010;298(5):C1057-65.
- 450 3. Walker NM, Simpson JE, Brazill JM, Gill RK, Dudeja PK, Schweinfest CW,  
451 Clarke LL. Role of down-regulated in adenoma anion exchanger in  $\text{HCO}_3^-$   
452 secretion across murine duodenum. *Gastroenterology* 2009;136(3):893-901.
- 453 4. Xiao F, Yu Q, Li J, Johansson ME, Singh AK, Xia W, Riederer B, Engelhardt R,  
454 Montrose M, Soleimani M, Tian DA, Xu G, Hansson GC, Seidler U. Slc26a3  
455 deficiency is associated with loss of colonic  $\text{HCO}_3^-$  secretion, absence of a  
456 firm mucus layer and barrier impairment in mice. *Acta Physiol (Oxf)*  
457 2014;211(1):161-75.
- 458 5. Gawenis LR, Hut H, Bot AG, Shull GE, de Jonge HR, Stien X, Miller ML, Clarke  
459 LL. Electroneutral sodium absorption and electrogenic anion secretion across

- 460 murine small intestine are regulated in parallel. *Am J Physiol Gastrointest Liver*  
461 *Physiol* 2004;287(6):G1140-9.
- 462 6. Gennari FJ, Weise WJ. Acid-base disturbances in gastrointestinal disease. *Clin J*  
463 *Am Soc Nephrol* 2008;3(6):1861-8.
- 464 7. Kato A, Romero MF. Regulation of electroneutral NaCl absorption by the small  
465 intestine. *Annu Rev Physiol* 2011;73:261-81.
- 466 8. Sundaram U, Knickelbein RG, Dobbins JW. Mechanism of intestinal secretion:  
467 effect of cyclic AMP on rabbit ileal crypt and villus cells. *Proc Natl Acad Sci U S A*  
468 1991;88(14):6249-53.
- 469 9. Ko SB, Shcheynikov N, Choi JY, Luo X, Ishibashi K, Thomas PJ, Kim JY, Kim  
470 KH, Lee MG, Naruse S, Muallem S. A molecular mechanism for aberrant CFTR-  
471 dependent HCO<sub>3</sub><sup>-</sup> transport in cystic fibrosis. *EMBO J* 2002;21(21):5662-72.
- 472 10. Chernova MN, Jiang L, Shmukler BE, Schweinfest CW, Blanco P, Freedman SD,  
473 Stewart AK, Alper SL. Acute regulation of the SLC26A3 congenital chloride  
474 diarrhoea anion exchanger (DRA) expressed in *Xenopus* oocytes. *J Physiol*  
475 2003;549(Pt 1):3-19.
- 476 11. Musch MW, Arvans DL, Wu GD, Chang EB. Functional coupling of the  
477 downregulated in adenoma Cl<sup>-</sup>/base exchanger DRA and the apical Na<sup>+</sup>/H<sup>+</sup>  
478 exchangers NHE2 and NHE3. *Am J Physiol Gastrointest Liver Physiol*  
479 2009;296(2):G202-10.
- 480 12. Dunk CR, Brown CD, Turnberg LA. Stimulation of Cl/HCO<sub>3</sub> exchange in rat  
481 duodenal brush border membrane vesicles by cAMP. *Pflugers Arch*  
482 1989;414(6):701-5.
- 483 13. Furukawa O, Bi LC, Guth PH, Engel E, Hirokawa M, Kaunitz JD. NHE3 inhibition  
484 activates duodenal bicarbonate secretion in the rat. *Am J Physiol Gastrointest*  
485 *Liver Physiol* 2004;286(1):G102-9.
- 486 14. Walker NM, Simpson JE, Yen PF, Gill RK, Rigsby EV, Brazill JM, Dudeja PK,  
487 Schweinfest CW, Clarke LL. Down-regulated in adenoma Cl/HCO<sub>3</sub> exchanger  
488 couples with Na/H exchanger 3 for NaCl absorption in murine small intestine.  
489 *Gastroenterology* 2008;135(5):1645-53 e3.



- 490 15. Chang E, Rao M. Intestinal water and electrolyte transport: mechanisms of  
491 physiological and adaptive responses. In: LR Johnson, ed. *Physiology of the*  
492 *gastrointestinal tract*. New York: Raven Press; 1994:2027-81.
- 493 16. Sellin JH, DeSoignie R. Rabbit proximal colon: a distinct transport epithelium. *Am*  
494 *J Physiol* 1984;246(5 Pt 1):G603-10.
- 495 17. In J, Foulke-Abel J, Zachos NC, Hansen AM, Kaper JB, Bernstein HD, Halushka  
496 M, Blutt S, Estes MK, Donowitz M, Kovbasnjuk O. Enterohemorrhagic reduce  
497 mucus and intermicrovillar bridges in human stem cell-derived colonoids. *Cell*  
498 *Mol Gastroenterol Hepatol* 2016;2(1):48-62 e3.
- 499 18. Foulke-Abel J, In J, Yin J, Zachos NC, Kovbasnjuk O, Estes MK, de Jonge H,  
500 Donowitz M. Human Enteroids as a model of upper small intestinal ion transport  
501 physiology and pathophysiology. *Gastroenterology* 2016;150(3):638-679.e8.
- 502 19. Yin J, Tse CM, Avula LR, Singh V, Foulke-Abel J, de Jonge HR, Donowitz M.  
503 Molecular basis and differentiation-associated alterations of anion secretion in  
504 human duodenal enteroid monolayers. *Cell Mol Gastroenterol Hepatol*  
505 2018;5(4):591-609.
- 506 20. Singh V, Lin R, Yang J, Cha B, Sarker R, Tse CM, Donowitz M. AKT and GSK-3  
507 Are Necessary for Direct Ezrin Binding to NHE3 as Part of a C-terminal  
508 Stimulatory Complex. *Journal of Biological Chemistry* 2014;289(9):5449-61.
- 509 21. Sarker R, Valkhoff VE, Zachos NC, Lin R, Cha B, Chen TE, Guggino S, Zizak M,  
510 de Jonge H, Hogema B, Donowitz M. NHERF1 and NHERF2 are necessary for  
511 multiple but usually separate aspects of basal and acute regulation of NHE3  
512 activity. *Am J Physiol Cell Physiol* 2011;300(4):C771-82.
- 513 22. Haggie PM, Cil O, Lee S, Tan J-A, Rivera AA, Phuan P-W, Verkman AS.  
514 SLC26A3 inhibitor identified in small molecule screen blocks colonic fluid  
515 absorption and reduces constipation. *JCI Insight* 2018;3(14).
- 516 23. Simpson JE, Schweinfest CW, Shull GE, Gawenis LR, Walker NM, Boyle KT,  
517 Soleimani M, Clarke LL. PAT-1 (Slc26a6) is the predominant apical membrane  
518 Cl<sup>-</sup>/HCO<sub>3</sub><sup>-</sup> exchanger in the upper villous epithelium of the murine duodenum.  
519 *Am J Physiol Gastrointest Liver Physiol* 2007;292(4):G1079-88.

- 520 24. Domingue JC, Ao M, Sarathy J, George A, Alrefai WA, Nelson DJ, Rao MC.  
521 HEK-293 cells expressing the cystic fibrosis transmembrane conductance  
522 regulator (CFTR): a model for studying regulation of Cl<sup>-</sup> transport. *Physiological*  
523 *Reports* 2014;2(9):e12158.
- 524 25. Park HW, Nam JH, Kim JY, Namkung W, Yoon JS, Lee JS, Kim KS, Venglovecz  
525 V, Gray MA, Kim KH, Lee MG. Dynamic regulation of CFTR bicarbonate  
526 permeability by [Cl<sup>-</sup>]<sub>i</sub> and its role in pancreatic bicarbonate secretion.  
527 *Gastroenterology* 2010;139(2):620-31.
- 528 26. Jacob P, Rossmann H, Lamprecht G, Kretz A, Neff C, Lin-Wu E, Gregor M,  
529 Groneberg DA, Kere J, Seidler U. Down-regulated in adenoma mediates apical  
530 Cl<sup>-</sup>/HCO<sub>3</sub><sup>-</sup> exchange in rabbit, rat, and human duodenum. *Gastroenterology*  
531 2002;122(3):709-24.
- 532 27. Li J, Xia F, Reithmeier RA. N-glycosylation and topology of the human SLC26  
533 family of anion transport membrane proteins. *Am J Physiol Cell Physiol*  
534 2014;306(10):C943-60.
- 535 28. Hayashi H, Yamashita Y. Role of N-glycosylation in cell surface expression and  
536 protection against proteolysis of the intestinal anion exchanger SLC26A3. *Am J*  
537 *Physiol Cell Physiol* 2012;302(5):C781-95.
- 538 29. Cordat E, Reithmeier RA. Structure, function, and trafficking of SLC4 and SLC26  
539 anion transporters. *Curr Top Membr* 2014;73:1-67.
- 540 30. Kumar A, Chatterjee I, Gujral T, Alakkam A, Coffing H, Anbazhagan AN,  
541 Borthakur A, Saksena S, Gill RK, Alrefai WA, Dudeja PK. Activation of nuclear  
542 factor-kappaB by tumor necrosis factor in intestinal epithelial cells and mouse  
543 intestinal epithelia reduces expression of the chloride transporter SLC26A3.  
544 *Gastroenterology* 2017;153(5):1338-50 e3.
- 545 31. Lamprecht G, Baisch S, Schoenleber E, Gregor M. Transport properties of the  
546 human intestinal anion exchanger DRA (down-regulated in adenoma) in  
547 transfected HEK293 cells. *Pflugers Arch* 2005;449(5):479-90.
- 548 32. Marchelletta RR, Gareau MG, McCole DF, Okamoto S, Roel E, Klinkenberg R,  
549 Guiney DG, Fierer J, Barrett KE. Altered expression and localization of ion

- 550 transporters contribute to diarrhea in mice with Salmonella-induced enteritis.  
551 Gastroenterology 2013;145(6):1358-68 e1-4.
- 552 33. Gill RK, Borthakur A, Hodges K, Turner JR, Clayburgh DR, Saksena S, Zaheer  
553 A, Ramaswamy K, Hecht G, Dudeja PK. Mechanism underlying inhibition of  
554 intestinal apical Cl/OH exchange following infection with enteropathogenic E. coli.  
555 J Clin Invest 2007;117(2):428-37.
- 556 34. Xiao F, Li J, Singh AK, Riederer B, Wang J, Sultan A, Park H, Lee MG,  
557 Lamprecht G, Scholte BJ, De Jonge HR, Seidler U. Rescue of epithelial HCO<sub>3</sub>-  
558 secretion in murine intestine by apical membrane expression of the cystic fibrosis  
559 transmembrane conductance regulator mutant F508del. J Physiol  
560 2012;590(21):5317-34.
- 561 35. Gentsch M, Dang H, Dang Y, Garcia-Caballero A, Suchindran H, Boucher RC,  
562 Stutts MJ. The cystic fibrosis transmembrane conductance regulator impedes  
563 proteolytic stimulation of the epithelial Na<sup>+</sup> channel. J Biol Chem  
564 2010;285(42):32227-32.
- 565 36. Huang J, Kim D, Shan J, Abu-Arish A, Luo Y, Hanrahan JW. Most bicarbonate  
566 secretion by Calu-3 cells is mediated by CFTR and independent of pendrin.  
567 Physiol Rep 2018;6(5).
- 568 37. Ko SB, Zeng W, Dorwart MR, Luo X, Kim KH, Millen L, Goto H, Naruse S,  
569 Soyombo A, Thomas PJ, Muallem S. Gating of CFTR by the STAS domain of  
570 SLC26 transporters. Nat Cell Biol 2004;6(4):343-50.

571

## 572 **Figure Legends**

### 573 **Figure 1. Protein expression of DRA increases in post-confluent Caco-2 cells and** 574 **differentiated colonoids.**

575 (A) Immunoblotting of DRA was performed using the mouse monoclonal antibody from  
576 Santa Cruz (sc-376187). Two bands of DRA were detected in wild-type Caco-2 cells,  
577 while no band was identified in DRA-knockout Caco-2 cells edited by CRISPR-Cas9.

578 (B) In Caco-2 cells that were grown on Transwell inserts, the protein expression of DRA  
579 was increased over time after cells reached confluency.

580 (C) Human colonoids were grown on Transwell inserts and differentiated for 5 days. The  
581 protein expression of DRA was studied in paired differentiated (DF) and undifferentiated  
582 (UD) colonoid monolayers and quantitated using GAPDH as the loading control. DRA  
583 protein expression was  $6.8 \pm 1.5$  times higher in differentiated colonoids than  
584 undifferentiated colonoids (n=3).

585 (D) Representative immunofluorescence results showing that DRA protein was located  
586 mostly on the apical membrane in post-confluent Caco-2 and differentiated colonoid  
587 monolayers. Red: DRA; blue: Hoechst. Similar results were seen in two repeated  
588 experiments.

589 (E-F) Representative immunofluorescence results showing the localization of DRA (E)  
590 and CFTR (F) in human proximal colon. Images were obtained from the atlas of  
591 intestinal transport (<https://www.jrturnerlab.com/Transporter-Images>). Similar results  
592 were seen in histologic sections from more than three normal subjects for both DRA and  
593 CFTR.

594

595 **Figure 2. Validation of  $\text{Cl}^-/\text{HCO}_3^-$  exchange functional assay.**

596 (A-C)  $\text{Cl}^-/\text{HCO}_3^-$  exchange activity was determined in HEK293/DRA cells (A), Caco-2  
597 monolayers (B), and colonoid monolayers (C). A rapid intracellular alkalinization was  
598 observed following the removal of extracellular  $\text{Cl}^-$ , and a rapid intracellular acidification  
599 occurred following the replenishment of extracellular  $\text{Cl}^-$ . Multiple cycles of removing  
600 and replenishing extracellular  $\text{Cl}^-$  were performed in a single sample. Compared to the  
601 first cycle, the second cycle gave very similar rate of intracellular alkalinization  
602 (HEK293/DRA:  $100 \pm 9\%$ , n=11; Caco-2:  $99 \pm 5\%$ , n=7; colonoids:  $103 \pm 4\%$ , n=13).

603 (D) The initial rate of intracellular alkalinization following extracellular  $\text{Cl}^-$  removal was  
604 greater in HEK cells expressing DRA ( $0.63 \pm 0.10/\text{min}$ , n=13) than wild-type HEK cells  
605 ( $0.05 \pm 0/\text{min}$ , n=13). The endogenous alkalinization in wild-type HEK cells contributed  
606 to only a small percent (8%) of alkalinization in HEK293/DRA cells.

607 (E) Post-confluent Caco-2 cells showed endogenous  $\text{Cl}^-/\text{HCO}_3^-$  exchange activity, while  
608 DRA-knockout Caco-2 cells had no detectable  $\text{Cl}^-/\text{HCO}_3^-$  exchange activity. n=3 for  
609 each.

610

611 **Figure 3. Cl<sup>-</sup>/HCO<sub>3</sub><sup>-</sup> exchange is carried out by an ion transporter that is not able**  
612 **to mediate SO<sub>4</sub><sup>2-</sup>/HCO<sub>3</sub><sup>-</sup> exchange.**

613 SO<sub>4</sub><sup>2-</sup>/HCO<sub>3</sub><sup>-</sup> exchange activity was studied using a SO<sub>4</sub><sup>2-</sup>-based superfusate that does  
614 not contain Cl<sup>-</sup>. In these experiment, NHE3 inhibitor, Tenapanor (provided by Ardelyx,  
615 Inc., Fremont, CA) and NHE1 and 2 inhibitor, HOE-694 (provided by Jorgen Peunter,  
616 Sanofi) were used in lieu of amiloride in the SO<sub>4</sub><sup>2-</sup>-based superfusate. While Cl<sup>-</sup>/HCO<sub>3</sub><sup>-</sup>  
617 exchange was observed, no SO<sub>4</sub><sup>2-</sup>/HCO<sub>3</sub><sup>-</sup> exchange activity was detected in  
618 HEK293/DRA cells (A), Caco-2 monolayers (B), and colonoid monolayers (C),  
619 suggesting the process of Cl<sup>-</sup>/HCO<sub>3</sub><sup>-</sup> exchange in these cell models was carried out by  
620 an ion transporter that is not able to perform SO<sub>4</sub><sup>2-</sup>/HCO<sub>3</sub><sup>-</sup> exchange. These experiments  
621 were repeated at least 3 times and similar results were found in each experiment.

622

623 **Figure 4. Effect of DRA inhibitor on Cl<sup>-</sup>/HCO<sub>3</sub><sup>-</sup> exchange.**

624 (A-C) The Cl<sup>-</sup>/HCO<sub>3</sub><sup>-</sup> exchange activity in HEK293/DRA cells (A), Caco-2 monolayers  
625 (B), and colonoid monolayers (C) was mostly abolished by a novel DRA inhibitor,  
626 DRA<sub>inh</sub>-A250 (5 μmol/L, apical and basolateral), indicating that DRA is the major Cl<sup>-</sup>  
627 /HCO<sub>3</sub><sup>-</sup> exchanger in these three cell types.

628

629 **Figure 5. Forskolin stimulates DRA activity in Caco-2 and human colonoids but**  
630 **not in HEK293/DRA cells.**

631 (A-B) Forskolin did not change the DRA activity in HEK293/DRA cells (n=6). n.s.: not  
632 significant.

633 (C-D) Representative traces showing that forskolin stimulates DRA activity in Caco-2  
634 monolayers (C) and colonoid monolayers (D). Quantitation is shown in Figure 8.

635

636 **Figure 6. Forskolin increases the surface amount of DRA protein in Caco-2 cells.**

637 (A-B) The surface expression of DRA protein was studied by surface biotinylation.  
638 Forskolin (10 μmol/L, apical and basolateral, 30 min) caused an increase in the  
639 percentage of surface amount without changing the total amount of DRA protein in post-  
640 confluent Caco-2 monolayers. Quantitation was performed by comparing forskolin-

641 treated and untreated control samples with controls in each experiment set as 100%.  
642 n=4.

643 (C) Representative immunofluorescence results showing an increased amount of DRA  
644 protein on the apical membrane of polarized proximal colonoid cells following forskolin  
645 treatment (10  $\mu$ mol/L, apical and basolateral, 30 min). Red: DRA; blue: Hoechst. Similar  
646 results were seen in two repeated experiments.

647

648 **Figure 7. Expression of CFTR in HEK293/DRA cells reconstitutes the stimulatory**  
649 **effect of forskolin on DRA activity, which is independent of CFTR function.**

650 (A) DRA activity was determined in HEK293/DRA cells as well as HEK293/DRA cells  
651 that were transiently transfected with CFTR, using superfusate that contained forskolin  
652 (10  $\mu$ mol/L, apical and basolateral) and/or CFTR<sub>inh</sub>-172 (5  $\mu$ mol/L, apical). Data were  
653 normalized to that of HEK293/DRA cells under basal condition (set as 100%). A  
654 stimulatory effect of forskolin on DRA activity was observed in CFTR-expressing cells,  
655 and the stimulation was not affected by inhibiting CFTR activity using CFTR<sub>inh</sub>-172.

656 Number of experiments is shown as n. *P* values are shown for the specific comparisons  
657 designated. n.s.: not significant.

658 (B-C) Representative traces showing the stimulatory effect of forskolin on DRA activity  
659 in HEK293/DRA/CFTR cells, in the absence (B) and the presence (C) of CFTR<sub>inh</sub>-172.

660

661 **Figure 8. CFTR<sub>inh</sub>-172 does not affect the stimulatory effect of forskolin on DRA**  
662 **activity in Caco-2 and colonoid monolayers.**

663 In Caco-2 monolayers (A-C) and colonoid monolayers (D-F), CFTR<sub>inh</sub>-172 did not  
664 change the basal activity of DRA (B, E) or the stimulatory effect of forskolin (C, F).

665 Number of experiments is shown as n. *P* values are shown for the specific comparisons  
666 designated. n.s.: not significant.

667

668

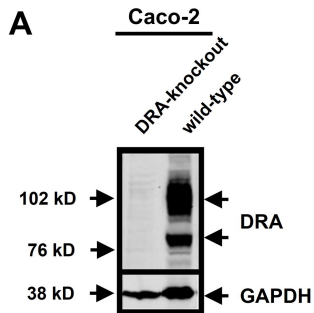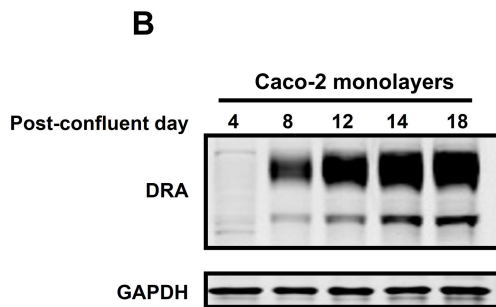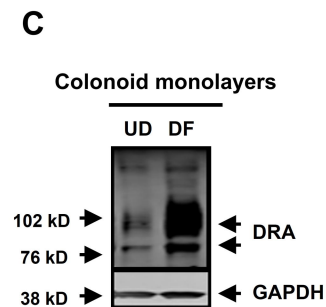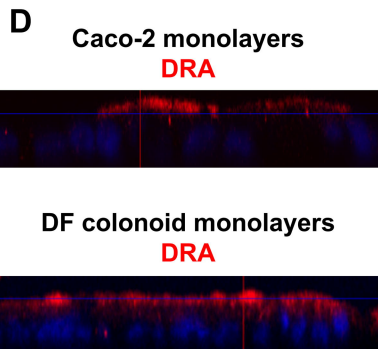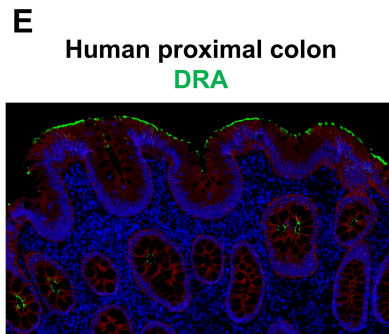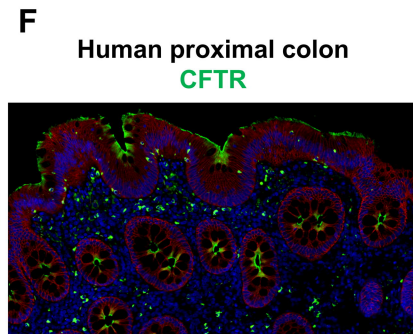

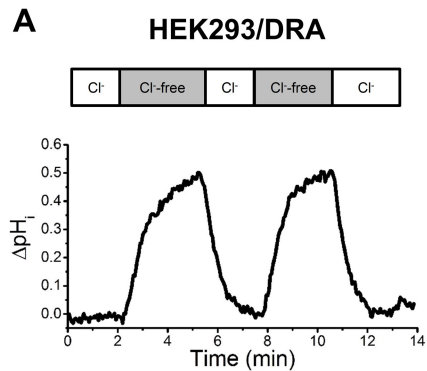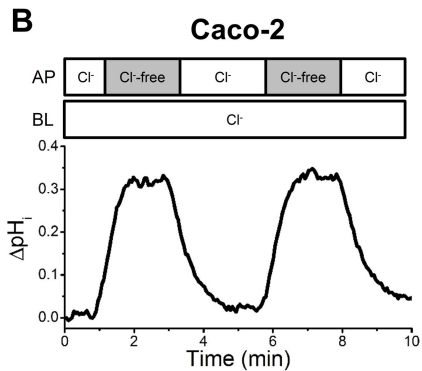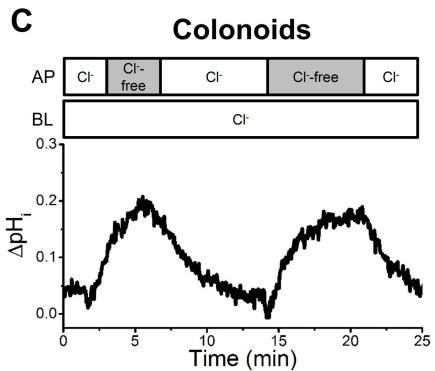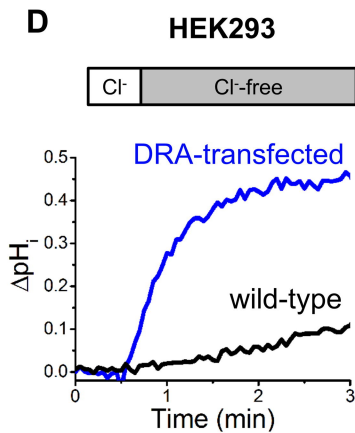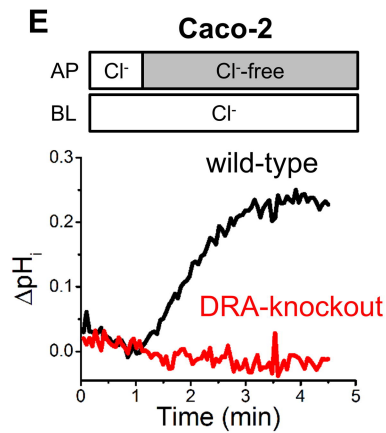



**A****HEK293/DRA**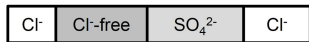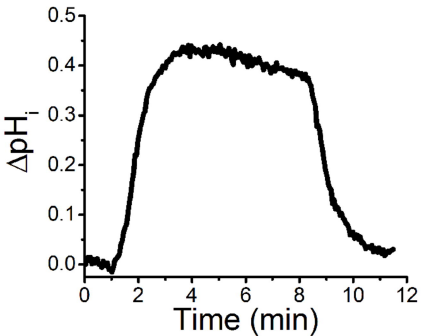**B****Caco-2**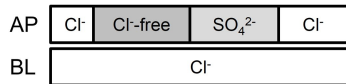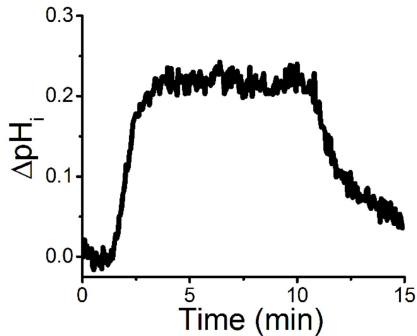**C****Colonoids**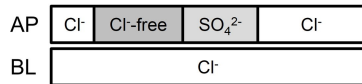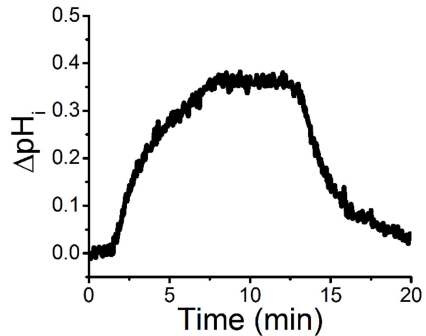

**A****HEK293/DRA**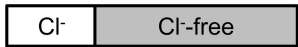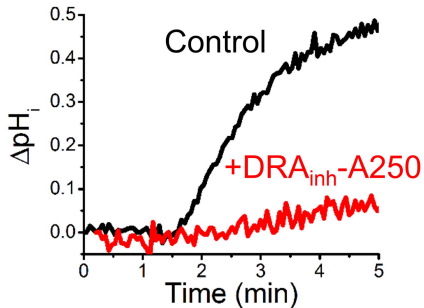**B****Caco-2**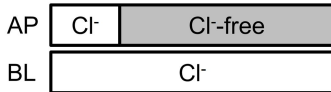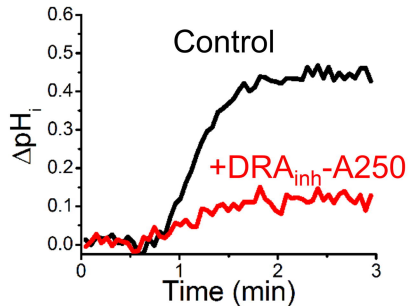**C****Colonoids**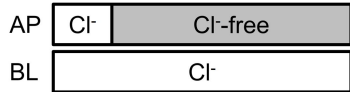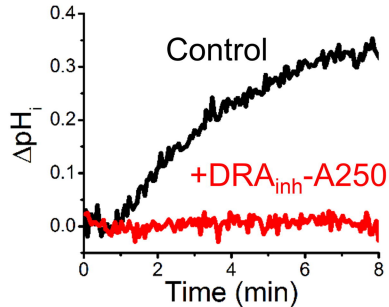

**A****HEK293/DRA**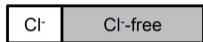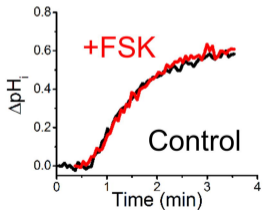**B****HEK293/DRA**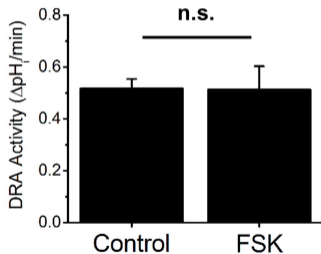**C****Caco-2**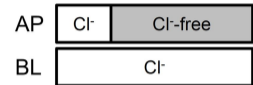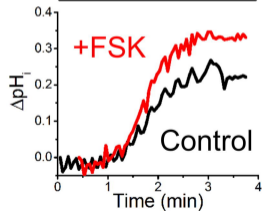**D****Colonoids**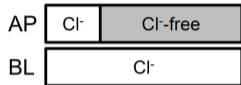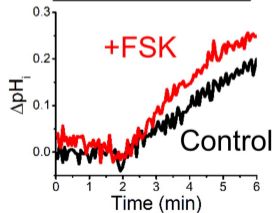

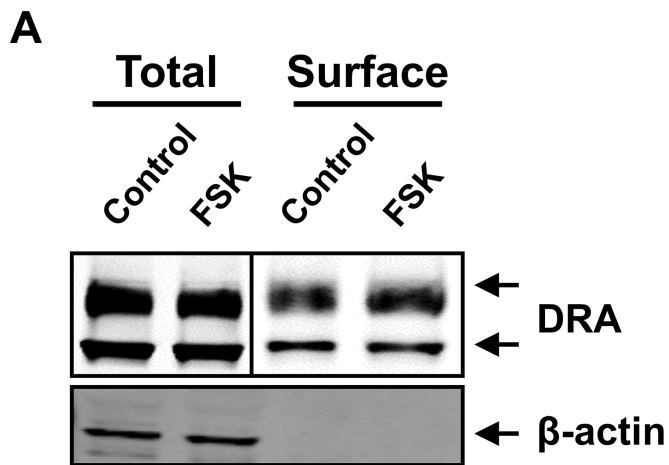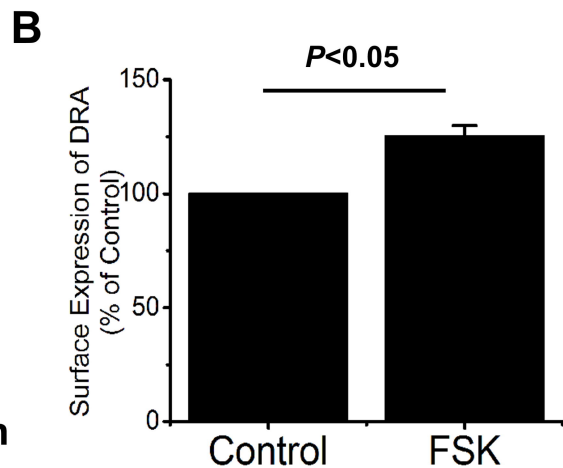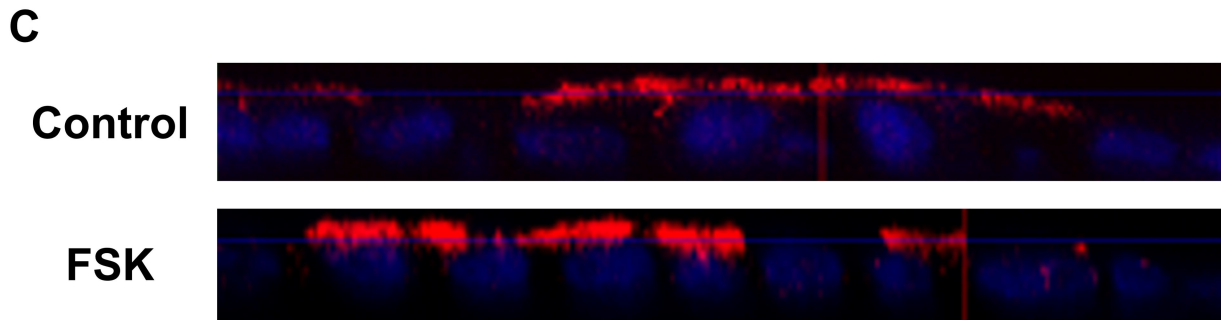

**A****HEK293/DRA**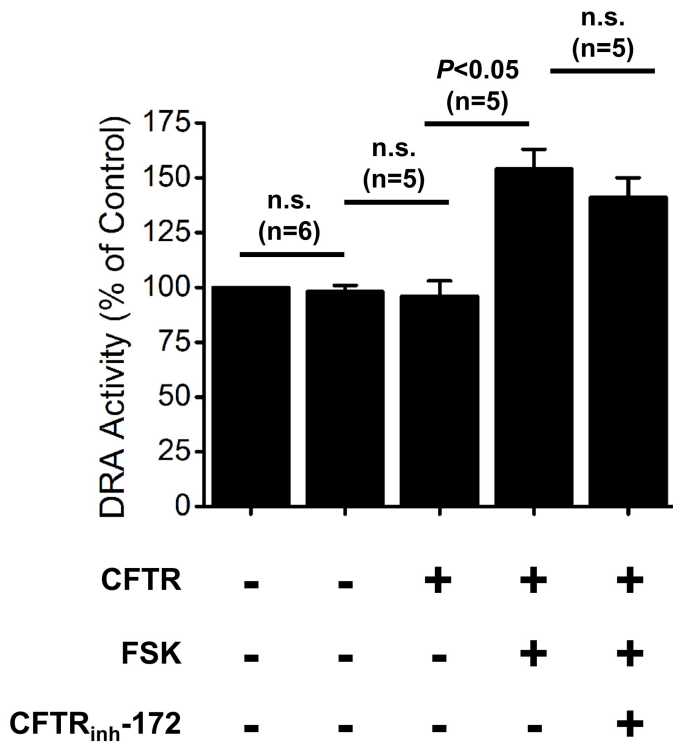**B**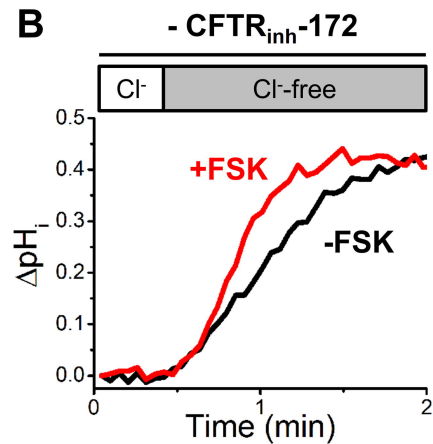**C**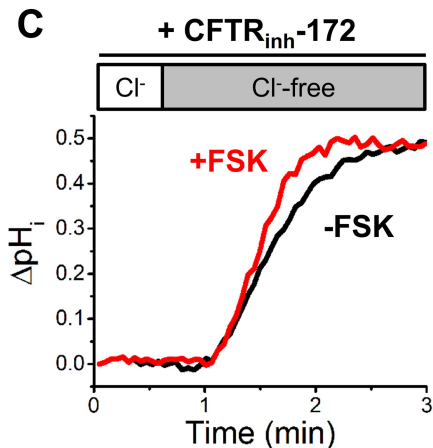

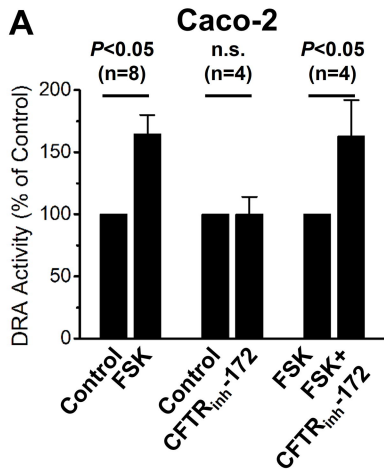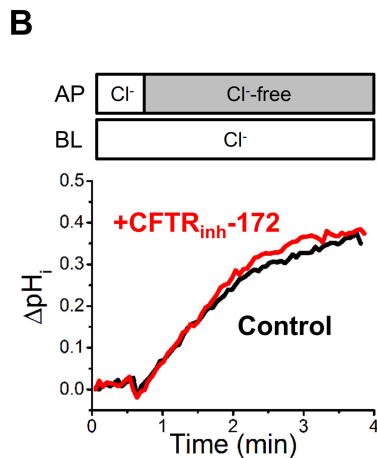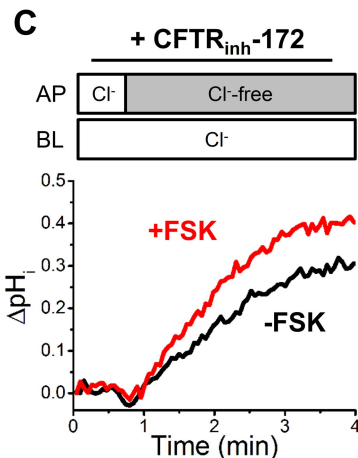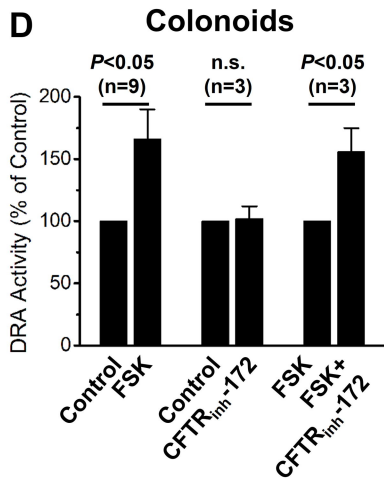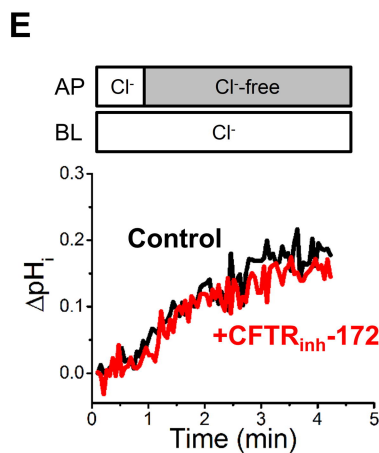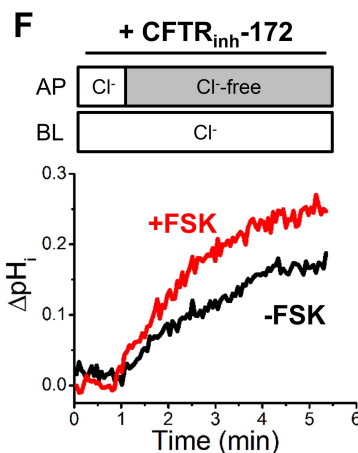

Source: http://biorxiv.org/content/10.1101/396408v1.full.pdf
